# Supplementary material
Source: publisher figshare collection journal article supplement (https://acs.figshare.com/ndownloader/files/4494742)
Supplement: Supplementary file 1 [file 4494742]

## Supporting Information

# Multiple Transmission-Reflection Infrared Spectroscopy (MTR-IR) for Arachidic Acid LB Films on Hydrophilic and Hydrophobic Silicon Surfaces

*Peng-Feng Guo, Hong-Bo Liu, Xiang Liu, Hong-Fang Li, Wen-Yi Huang, Shou-Jun*

*Xiao\**

State Key Laboratory of Coordination Chemistry, School of Chemistry and Chemical Engineering, Nanjing National Laboratory of Microstructures, Nanjing University, Nanjing 210093, China

Author for correspondence: Shou-Jun Xiao

Tel: 86-25-83621001; Fax: 86-25-83314502.

E-mail: [sjxiao@nju.edu.cn](mailto:sjxiao@nju.edu.cn) (Shou-Jun Xiao)

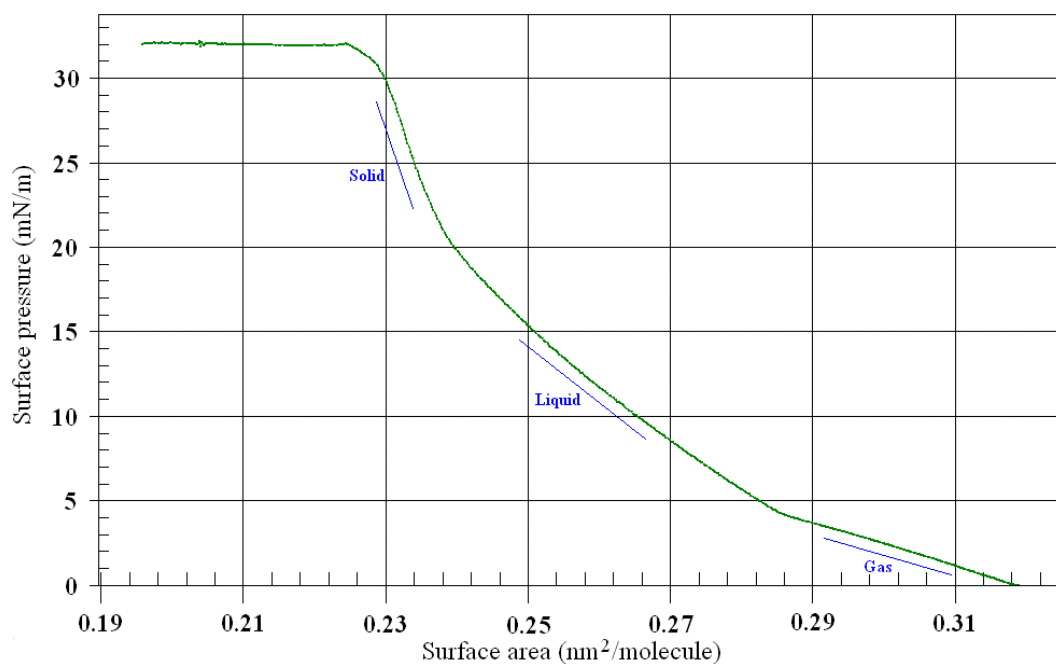

**Figure S1.**  $\pi$ -A isotherm of arachidic acid on a pure water subphase with a compression speed of 5 mm/min at 20 °C.

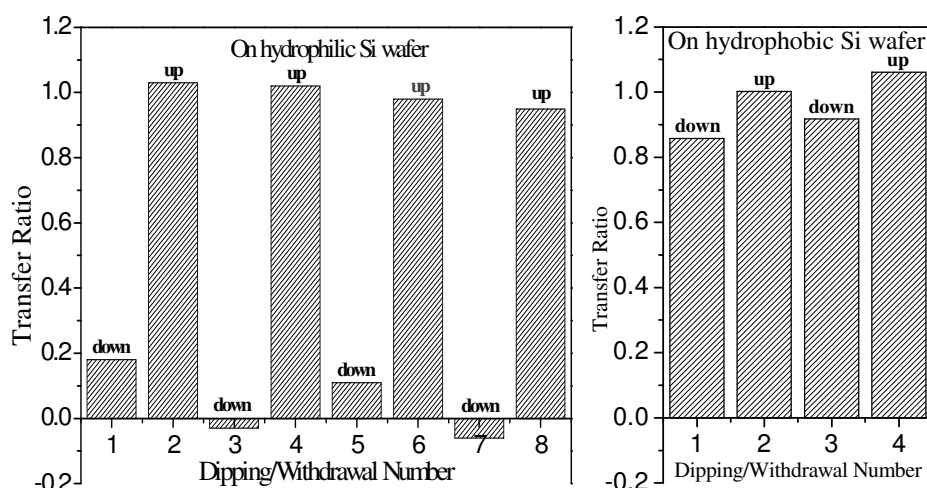

**Figure S2.** Transfer ratios of 4 monolayers' depositions on hydrophilic (left) and hydrophobic (right) silicon chips respectively. The signs of “up” (upstroke) and “down” (downstroke) indicate the dipping directions respectively.
